# Supplementary material for: Targeted H2O activation to manipulate the selective photocatalytic reduction of CO2to CH3OH over carbon nitride-supported cobalt sulfide
Source: Royal Society of Chemistry journal article supplement (doi:10.1039/d2gc03226k), 2022-01-01
Supplement: d2gc03226k1.pdf [file d2gc03226k1.pdf]

## Supplementary Information

### **Targeted H<sub>2</sub>O activation to manipulate the selective photocatalytic reduction of CO<sub>2</sub> to CH<sub>3</sub>OH over carbon nitride supported cobalt sulfide**

Minzhi Ma<sup>[a], [b]</sup>, Zeai Huang<sup>[a], [b]</sup>, Rui Wang<sup>[b]</sup>, Ruiyang Zhang<sup>[b]</sup>, Tian Yang<sup>[b]</sup>, Zhiqiang Rao<sup>[b]</sup>, Wenjun Fa<sup>[c]</sup>, Fengying Zhang<sup>[b]</sup>, Yuehan Cao<sup>[b]</sup>, Shan Yu<sup>[b]</sup>, and Ying Zhou\*<sup>[a], [b]</sup>

[a] State Key Laboratory of Oil and Gas Reservoir Geology and Exploitation, Southwest Petroleum University, Chengdu, 610500, China.

[b] School of New Energy and Materials, Southwest Petroleum University, Chengdu, 610500, China.

[c] Key Laboratory of Micro-Nano Materials for Energy Storage and Conversion of Henan Province & College of Chemical and Materials Engineering, Xuchang University, Xuchang, Henan 461000, China.

Corresponding authors: Ying Zhou (yzhou@swpu.edu.cn)

## Table of contents

|                                                                                      |    |
|--------------------------------------------------------------------------------------|----|
| 1 Experiments .....                                                                  | 3  |
| 1.1 Materials .....                                                                  | 3  |
| 1.2 Photoelectrochemical measurements .....                                          | 4  |
| 2 Results and Discussion .....                                                       | 5  |
| 2.1 The XRD spectra.....                                                             | 5  |
| 2.2 Cycle experiments of photocatalytic reduction CO <sub>2</sub> on CN surface..... | 6  |
| 2.3 Photocatalytic CO <sub>2</sub> reduction performance .....                       | 7  |
| 2.4 Cycle experiments of photocatalytic reduction CO <sub>2</sub> by CS/CN-0.5.....  | 8  |
| 2.5 XAS spectra .....                                                                | 9  |
| 2.6 XPS spectra .....                                                                | 10 |
| 2.7 XRD patterns .....                                                               | 11 |
| 2.8 TG spectra.....                                                                  | 12 |
| 2.9 Isotope experiment.....                                                          | 13 |
| 2.10 The UV-vis spectra .....                                                        | 14 |
| 2.11 High-resolution Co 2p and S 2p XPS spectrum.....                                | 15 |
| 2.12 FT of Co K-edge EXAFS spectra of CS/CN-0.5 .....                                | 16 |
| 2.13 The N <sub>2</sub> isothermal adsorption/desorption measurements .....          | 17 |
| 2.14 Tauc plots and band structure .....                                             | 18 |
| 2.15 Radical-trapping experiment.....                                                | 19 |
| 2.16 <i>In situ</i> DRIFTS experiments .....                                         | 20 |
| 2.17 In situ DRIFTS experiments .....                                                | 21 |
| 2.18 The Co K-edge EXAFS fitting parameters.....                                     | 22 |

# 1 Experiments

## 1.1 Materials

All used chemicals were analytical-grade reagents without any further purification. Cobalt nitrate hexahydrate and dicyandiamide were purchased from Aladdin Reagent Corp. Anhydrous H<sub>2</sub>SO<sub>4</sub> (98%), absolute ethanol (95%), sodium sulfide nonahydrate and silica sand (70-150 mesh) were purchased from Chengdu Kelong Chemical Reagent Corp. 99% <sup>13</sup>C enriched <sup>13</sup>CO<sub>2</sub> was provided by Chengdu Keyuan Gas Corp.

## 1.2 Photoelectrochemical measurements

The photoelectrochemical measurements were conducted by using a CH760E electrochemical workstation (Chenhua Instrument, Shanghai, China) with a three-electrode system. The Ag/AgCl (KCl sat.) was used as the reference electrode, and Pt wire was used as the counter electrode. The working electrode was as-fabricated by a doctor blading technique (Binder: ethylcellulose; Basal: FTO; Active surface area: 1 cm<sup>2</sup>), and then it was treated at 90 °C for 3 hours. Photocurrent-time and electrochemical impedance measurements of as-prepared samples at open circuit potential (OCP) were performed in 0.5 M Na<sub>2</sub>SO<sub>4</sub>.

## 2 Results and Discussion

### 2.1 The XRD spectra

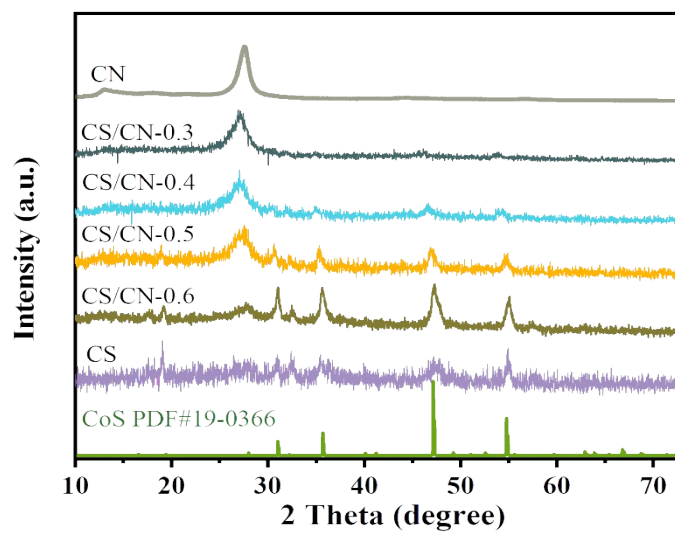

**Figure S1.** XRD spectra of the as-prepared samples.

## 2.2 Cycle experiments of photocatalytic reduction CO<sub>2</sub> on CN surface

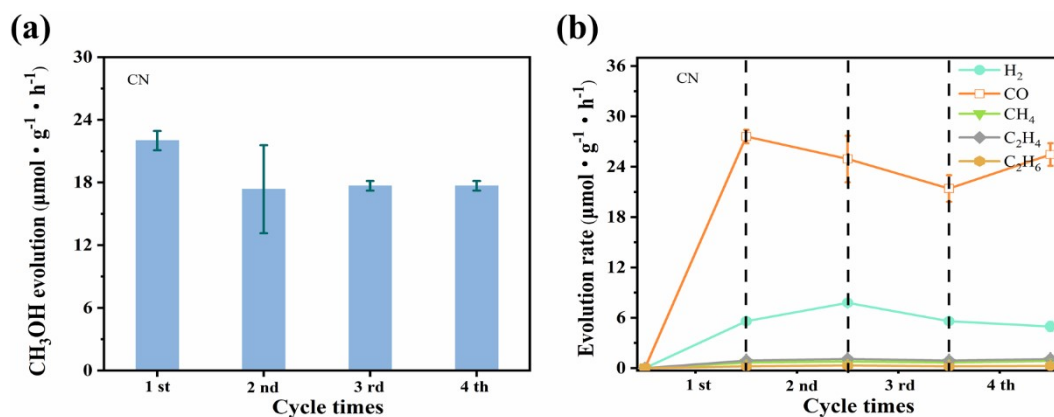

**Figure S2.** Cycle experiments of photocatalytic reduction CO<sub>2</sub> by CN: (a) CH<sub>3</sub>OH production; (b) H<sub>2</sub>, CO, C<sub>2</sub>H<sub>4</sub>, CH<sub>4</sub>, and C<sub>3</sub>H<sub>6</sub> generation (total: ~16 h).

## 2.3 Photocatalytic CO<sub>2</sub> reduction performance

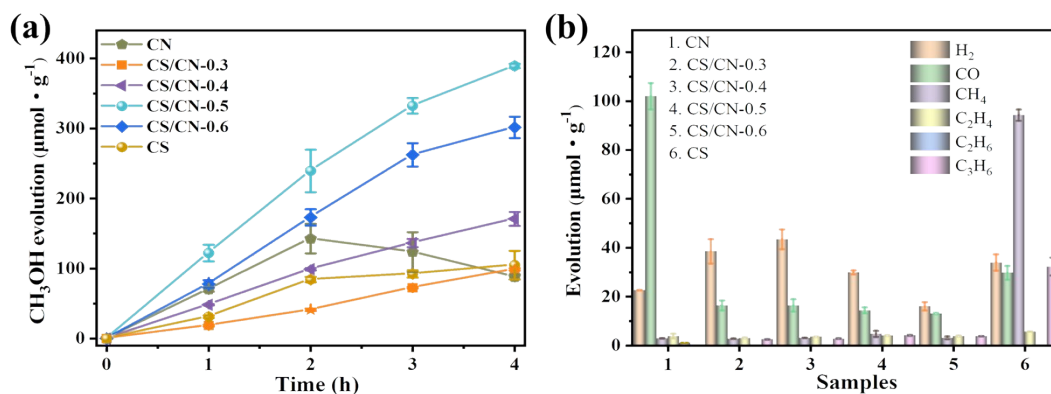

**Figure S3.** Photocatalytic activity of CO<sub>2</sub> photoreduction with H<sub>2</sub>O. (a) CH<sub>3</sub>OH production; (b) H<sub>2</sub>, CO, CH<sub>4</sub>, C<sub>2</sub>H<sub>4</sub>, C<sub>2</sub>H<sub>6</sub>, and C<sub>3</sub>H<sub>6</sub> products at 4 hours over the as-prepared photocatalysts.

## 2.4 Cycle experiments of photocatalytic reduction CO<sub>2</sub> by CS/CN-0.5

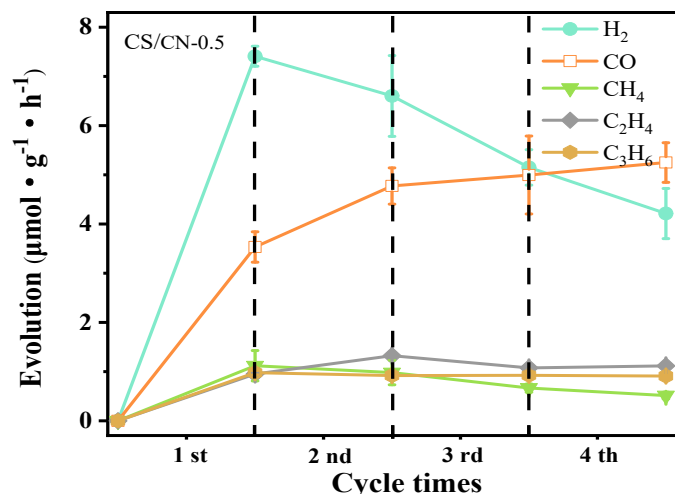

**Figure S4.** Cycle experiments of CS/CN-0.5 for photoreduction of CO<sub>2</sub>: H<sub>2</sub>, CO, C<sub>2</sub>H<sub>4</sub>, CH<sub>4</sub>, and C<sub>3</sub>H<sub>6</sub> generation rate (total: ~16 h).



## 2.5 XAS spectra

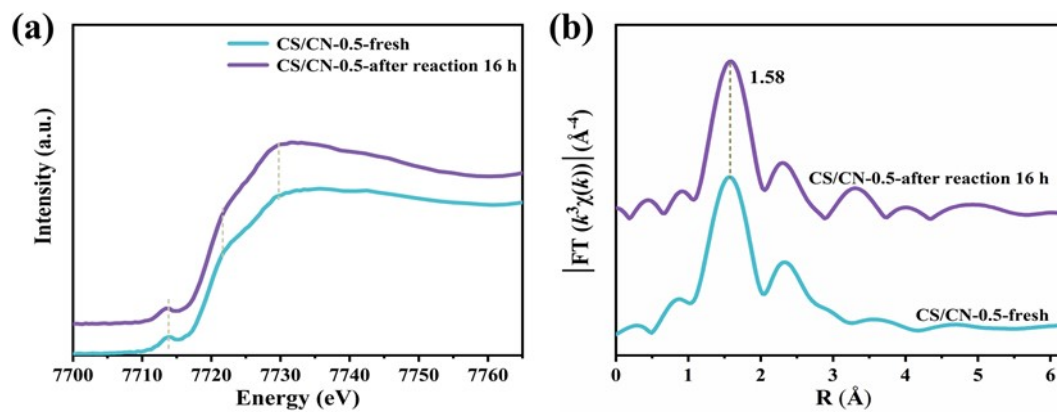

**Figure S5.** XAS spectra: (a) Co K-edge XANES spectra; (b) FT  $k^3$ -weight EXAFS spectra of the CS/CN-0.5-fresh and CS/CN-0.5-after reaction 16 h.

## 2.6 XPS spectra

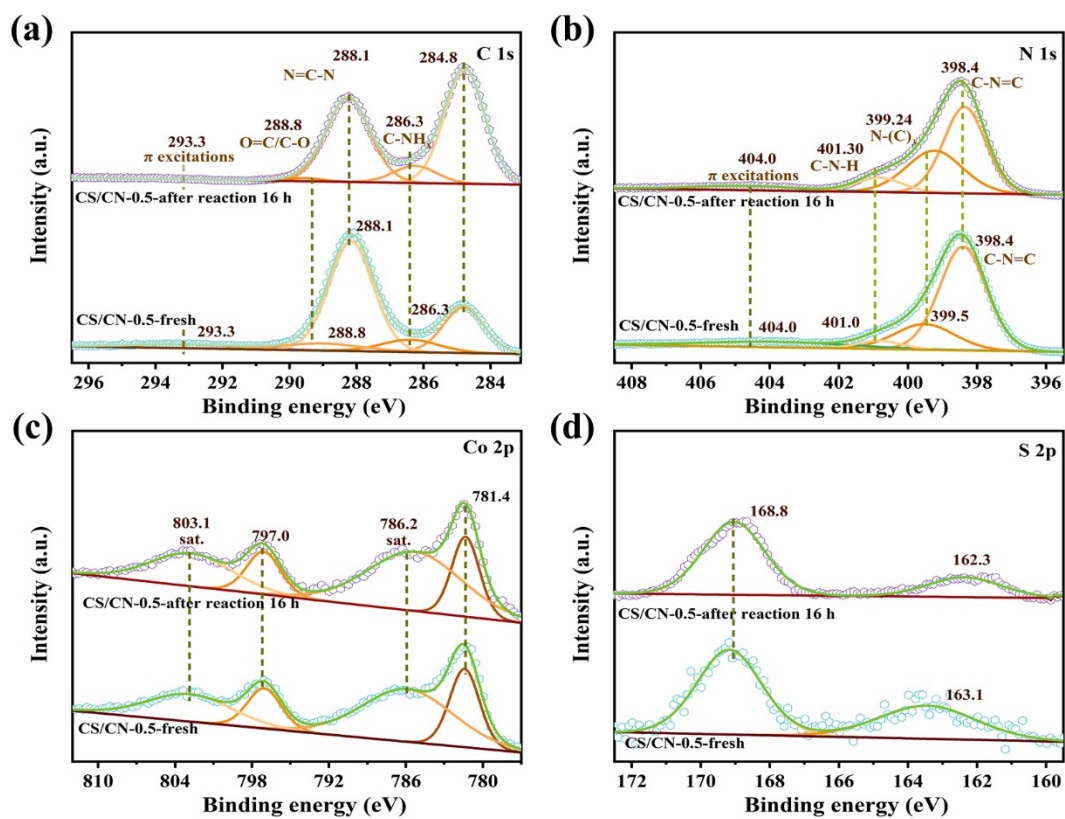

**Figure S6.** High-resolution C 1s (a), N 1s (b), (c) Co 2p, and (d) S 2p XPS spectra of the CS/CN-0.5-fresh and CS/CN-0.5-after reaction 16 h.

## 2.7 XRD patterns

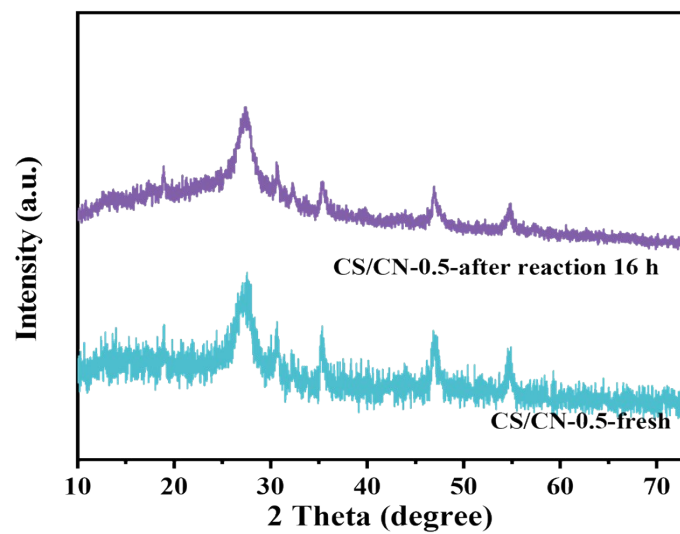

**Figure S7.** XRD patterns of the CS/CN-0.5-fresh and CS/CN-0.5-after reaction 16 h.

## 2.8 TG spectra

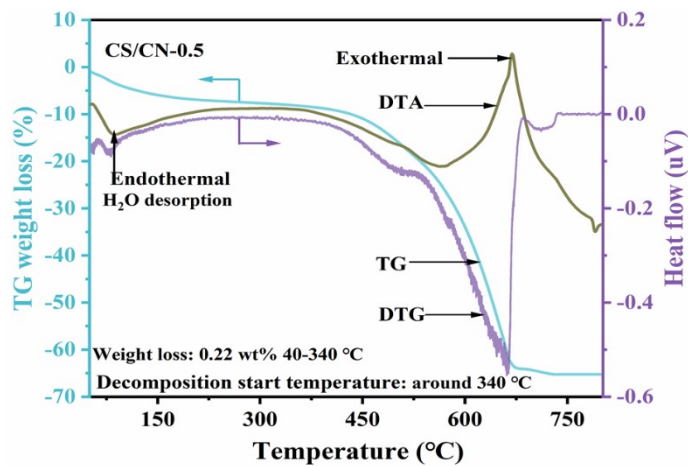

**Figure S8.** TG, DTA, and DTG curves of CS/CN-0.5.

## 2.9 Isotope experiment

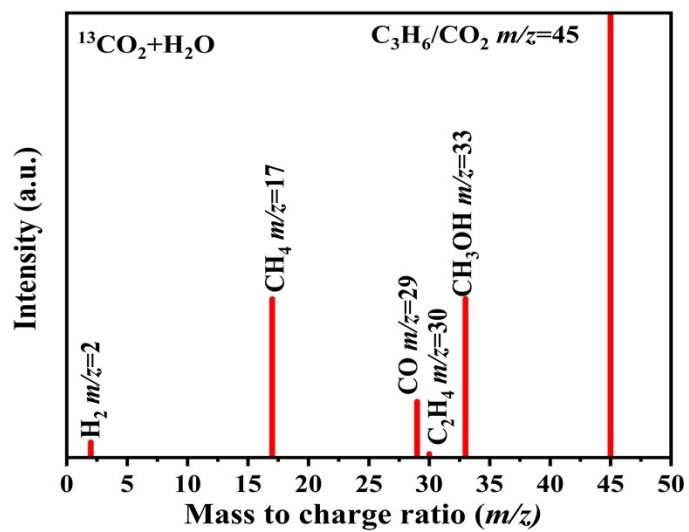

**Figure S9.** Mass spectra obtained during the photocatalytic conversion of  $^{13}\text{CO}_2$  over CS/CN-0.5.

## 2.10 The UV-vis spectra

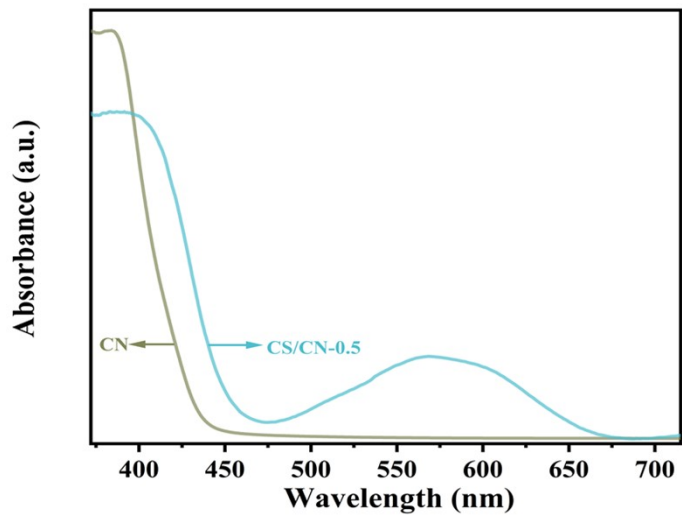

**Figure S10.** UV-vis diffuse reflectance spectra of CN and CS/CN-0.5.

## 2.11 High-resolution Co 2p and S 2p XPS spectra

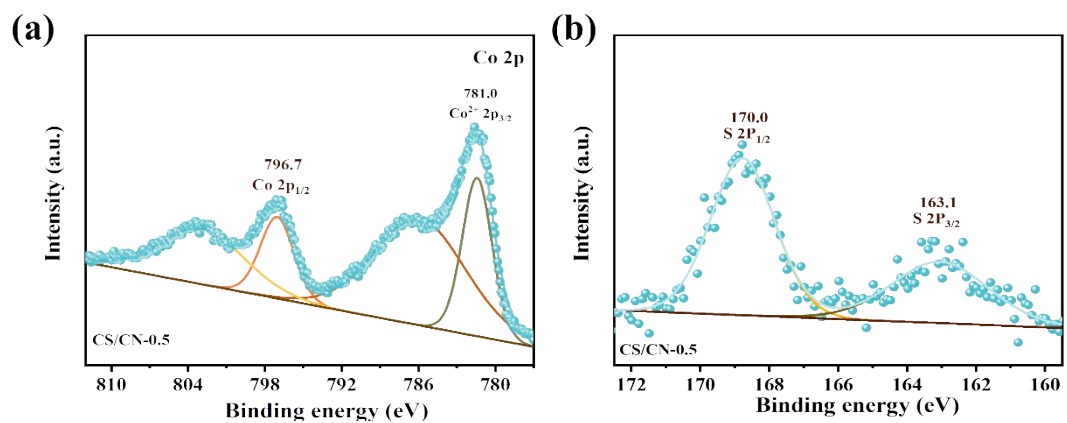

**Figure S11.** High-resolution Co 2p and S 2p XPS spectra of CS/CN-0.5.

## 2.12 FT of Co K-edge EXAFS spectra of CS/CN-0.5

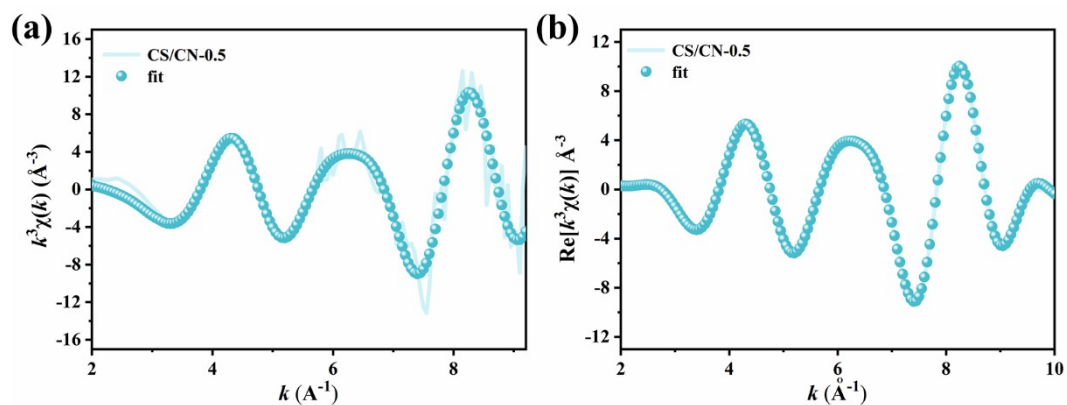

**Figure S12.** Fourier transform of Co K-edge EXAFS spectra in  $k$  (a) and  $q$  (b) space for the CS/CN-0.5.



## 2.13 The N<sub>2</sub> isothermal adsorption/desorption measurements

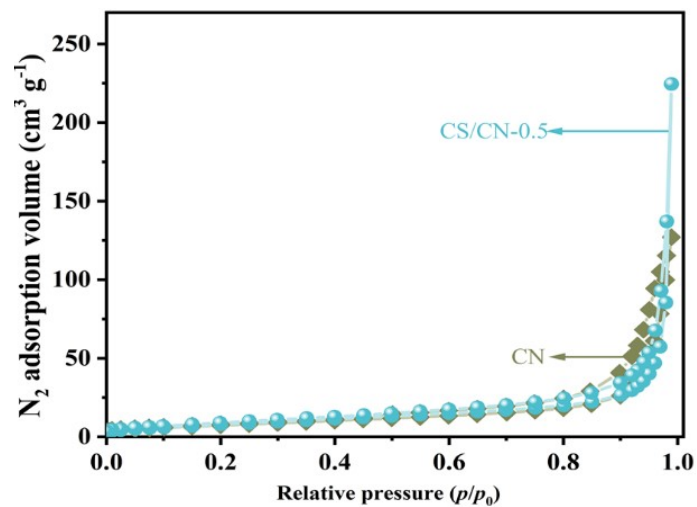

**Figure S13.** The N<sub>2</sub> isothermal adsorption/desorption measurements over CN and C/CN-0.5.

## 2.14 Tauc plots and band structure

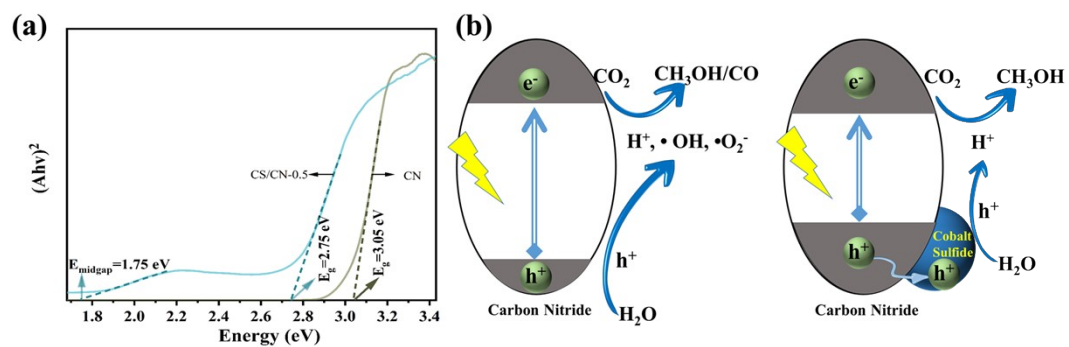

**Figure S14.** (a) Tauc plots of CS/CN-0.5 and CN; (b) Band structure of CS/CN-0.5 and CN.

## 2.15 Radical-trapping experiment

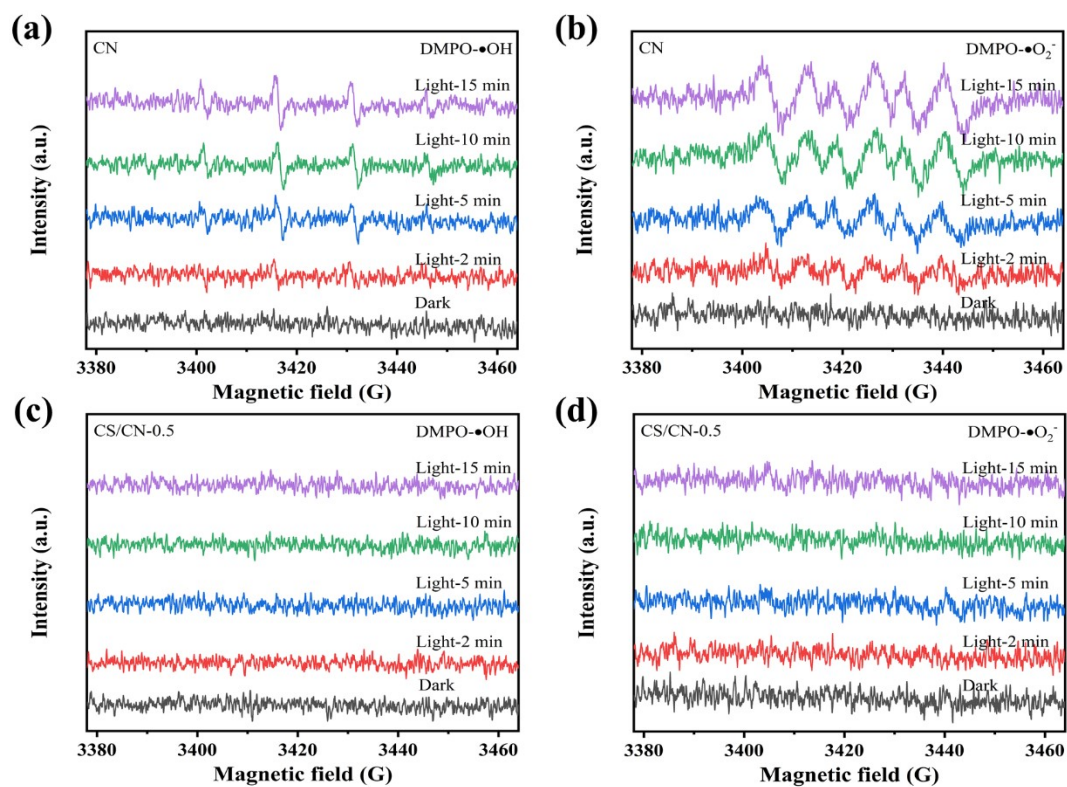

**Figure S15.** DMPO spin-trapping ESR spectra recorded for (a, c)  $\bullet$ OH and (b, d)  $\bullet$ O<sub>2</sub><sup>-</sup> over CN and CS/CN-0.5.

## 2.16 *In situ* DRIFTS experiments

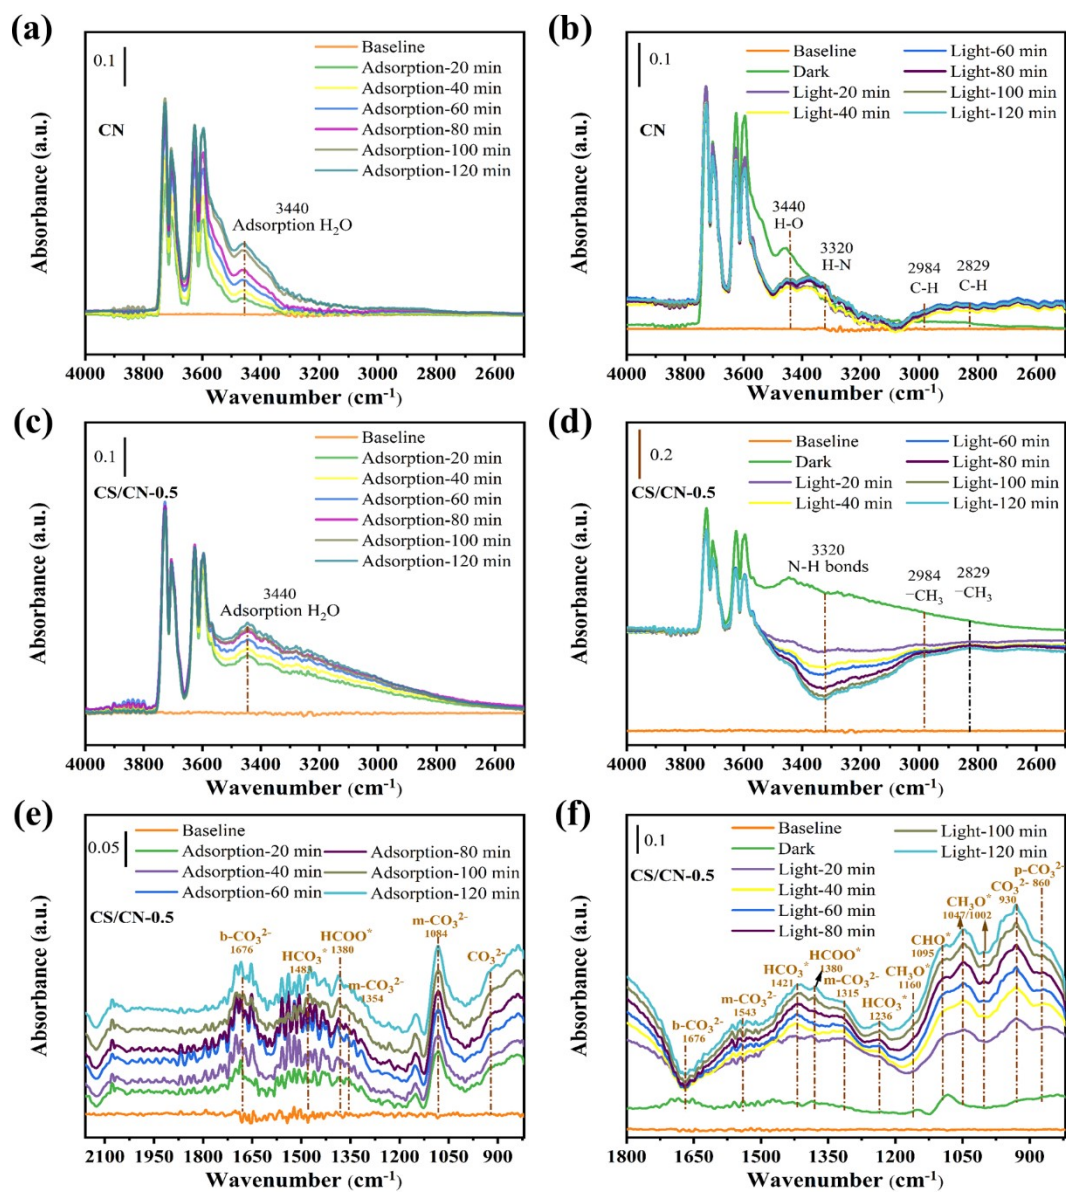

**Figure S16.** *In situ* DRIFTS spectra of photoreduction  $\text{CO}_2$  with  $\text{H}_2\text{O}$  process over CN and CS/CN-0.5. (a, c)  $\text{H}_2\text{O}$  adsorption under dark, (b, d)  $\text{H}_2\text{O}$  reduction process under light irradiation; (e)  $\text{CO}_2$  adsorption under dark, (f)  $\text{CO}_2$  reduction process under light irradiation.

## 2.17 In situ DRIFTS experiments

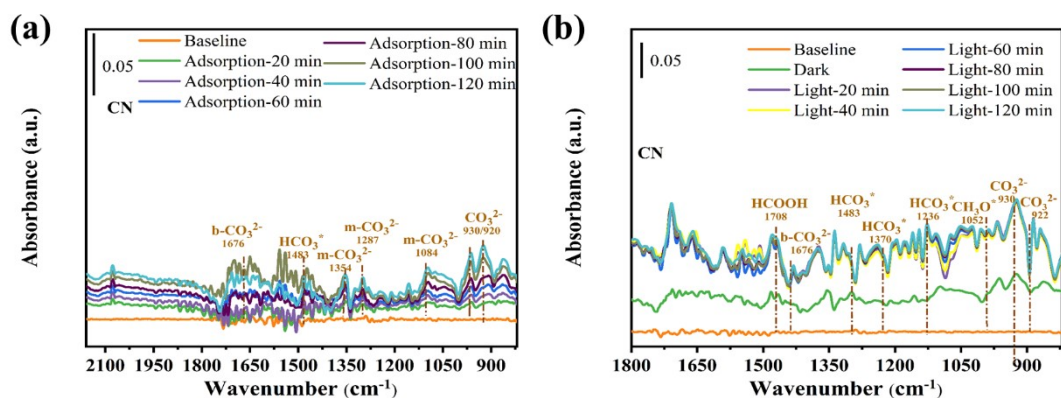

**Figure S17.** *In situ* DRIFTS spectra of CO<sub>2</sub> photoreduction process over CN (a) CO<sub>2</sub> adsorption under dark; and (b) CO<sub>2</sub> reduction process under light irradiation.

## 2.18 The Co K-edge EXAFS fitting parameters

**Table S1.** Structural parameters obtained from the Co K-edge EXAFS fits.

| <b>Samples</b> | <b>bonds</b> | <b>CN</b> | <b>R (Å)</b> | <b><math>\sigma^2(10^{-3} \text{ \AA}^2)</math></b> | <b><math>\Delta E</math> (eV)</b> | <b><math>\chi_v^2 / \text{R factor}</math></b> |
|----------------|--------------|-----------|--------------|-----------------------------------------------------|-----------------------------------|------------------------------------------------|
| CS/CN-0.5      | Co-C/N       | 2.5       | 0.028        | 5.0                                                 | 2.87                              | 21/0.0025                                      |
|                | Co-S         | 0.9       | 0.028        | 14.0                                                |                                   |                                                |
|                | Co-Co        | 3.1       | 0.21         | 6.7                                                 |                                   |                                                |
